# Supplementary material for: Machine-Learning-Based Forest Classification and Regression (FCR) for Spatial Prediction of Liver Fluke Opisthorchis viverrini (OV) Infection in Small Sub-Watersheds
Source: MDPI journal article supplement (doi:10.3390/ijgi12120503), 2023-12-14
Supplement: s1 [file s1]

**The attribute data extracted from (.shp) of each watershed**

**Table S1.** Descriptive accompanying data of sub-basins for use in independent variable modeling.

| Sub-basin name | Areas (sq.km.) | Perimeters | Average of DEM (meters) |
|----------------|----------------|------------|-------------------------|
|                |                | (km.)      |                         |
| Jomjaeng       | 66.183         | 46.434     | 160.445                 |
| Poopim         | 18.432         | 23.986     | 161.624                 |
| Phonnoi        | 64.081         | 46.779     | 166.147                 |
| Phonkaeyai     | 72.794         | 43.279     | 172.894                 |
| Wanplachuem-1  | 51.264         | 36.087     | 180.397                 |
| Wanplachuem-2  | 16.071         | 20.354     | 174.412                 |
| Klangmai       | 27.738         | 28.053     | 167.640                 |
| Nakaew         | 12.708         | 24.316     | 164.155                 |
| Nongphue       | 10.040         | 18.698     | 170.894                 |
| Maikrabok      | 14.259         | 19.312     | 163.884                 |

## Google Earth Engine (GEE) coding to download Sentinel2 (Thailand)

```
//1) AOI for download Sentinel 2
var c = ee.FeatureCollection('USDOS/LSIB_SIMPLE/2017')
.filter(ee.Filter.eq('country_na', 'Thailand'));
//2) Load Sentinel 2 data
var image = ee.ImageCollection('COPERNICUS/S2_SR')
.filterDate('2019-12-01', '2021-01-31')
//3) Filter to 10 percent cloud cover
.filter(ee.Filter.lt('CLOUDY_PIXEL_PERCENTAGE', 10))
.filterBounds(c)
.median();
// 4) Band composite
var visParamsTrue = {bands: ['B2', 'B3', 'B4'], min: 0, max: 2500,
gamma: 2};
Map.addLayer(image.clip(c), visParamsTrue, "Sentinel-2 Jan 2022");
// Applies scaling factors.
function applyScaleFactors(image) {
  var opticalBands = image.select('SR_B.').multiply(0.0000275).add(-
0.2);
  var thermalBands =
image.select('ST_*.').multiply(0.00341802).add(149.0);
  return image.addBands(opticalBands, null, true)
.addBands(thermalBands, null, true);
}
var dataset = applyScaleFactors(c);
var visualization = {
  bands: ['SR_B4', 'SR_B3', 'SR_B2'],
  min: 0.0,
  max: 0.25,
};
```
